# Supplementary material for: Fluorine-functionalized and simultaneously reduced graphene oxide as a novel hole transporting layer for highly efficient and stable organic photovoltaic cells
Source: Royal Society of Chemistry journal article supplement (doi:10.1039/c4nr01038h), 2014-01-01
Supplement: c4nr01038h1.pdf [file c4nr01038h1.pdf]

## Supporting Information

### **Fluorine-functionalized and simultaneously reduced graphene oxide as a novel hole transporting layer for highly efficient and stable organic photovoltaic cells**

Su-Hyeon Kim<sup>a</sup>, Cheol-Ho Lee<sup>b</sup>, Yong-Jin Noh<sup>a</sup>, Seok-Soon Kim<sup>c</sup>, Sungho Lee<sup>b</sup>, Seung Mu Jo<sup>b</sup>, Han-Ik Joh<sup>b,\*</sup>, and Seok-In Na<sup>a,\*</sup>

*<sup>a</sup>Professional Graduate School of Flexible and Printable Electronics, Polymer Materials Fusion Research Center, Chonbuk National University, 664-14, Deokjin-dong, Deokjin-gu, Jeonju-si, Jeollabuk-do, 561-756, Republic of Korea*

*<sup>b</sup>Carbon Convergence Materials Research Center, Institute of Advanced Composite Materials, Korea Institute of Science and Technology, San 101, Eunha-ri, Bongdong-eup, Wanju-gun, Jeollabuk-do, 565-905, Korea*

*<sup>c</sup>Department of Nano and Chemical Engineering, Kunsan National University, Kunsan, Jeollabuk-do 753-701, Republic of Korea*

#### **Experimental**

---

\* Corresponding authors. Tel.: +82 63 219 8137; fax: +82 63 219 8269

E-mail addresses: [hijoh@kist.re.kr](mailto:hijoh@kist.re.kr) (H.-I. Joh), [nsi12@jbnu.ac.kr](mailto:nsi12@jbnu.ac.kr) (S.-I. Na).

*Preparation of GO and rGO:* Graphene oxide was synthesized using a modified Hummers method. four grams of graphite flakes was added to a 250 ml round-bottom flask containing 120 ml of  $\text{H}_2\text{SO}_4$  and then stirred for 1 h. Four grams of  $\text{KMnO}_4$  powder was added to the mixture at 20 min intervals while stirring. The mixture was slowly heated to 40 °C and maintained for 6 h to oxidize the graphite. Subsequently, 150 ml of deionized (DI) water was added to the mixture. Seventeen milliliters of  $\text{H}_2\text{O}_2$  solution was added to the mixture, stirred for 30 min, and held under this condition for 24 h. Then, the mixture was centrifuged. The mixture was enclosed in a dialysis tube washed with ultrapure DI water several times to obtain a pH level of 5. Finally, the graphene oxide was dried in a freeze dryer at -60 °C for 48 h. The control rGO (CrGO) was synthesized using phenylhydrazine. First, 0.4 g of the as-synthesized graphene oxide was dispersed in 100 ml of DI water using an ultrasonic batch cleaner at 90 °C. Then, 2 ml of phenylhydrazine was added to the suspension and stirred for 6 h. Finally, the suspension was filtered using a vacuum filter and washed with methyl alcohol. The filtered cake was dried in an oven at 60 °C. Fluorine-functionalized and reduced graphene oxide (FrGO) was also synthesized using the same procedures described above, except using 4-(Trifluoromethyl)phenylhydrazine as the reductant instead of phenylhydrazine at 60 °C.

*Sample characterizations:* X-ray photoelectron spectroscopy (XPS) measurements for the chemical composition of rGOs were performed using a MultiLab 2000 XPS instrument with a monochromatic Al  $K\alpha$  source. The graphene sheet thickness and morphology of the rGO films were investigated using atomic force microscopy (AFM, Veeco, Digital Instruments Nanoscope IIIA). The electrical conductivity was analyzed using a four-point probe measurement (FPP-RS8, Dasol Eng.) and a surface profiler (Alphastep IQ, KLA Tencor). The work function and surface images of each sample were obtained using an ultraviolet photoelectron spectroscope (UPS) with a He 1 ( $h\nu = 21.2$  eV) excitation source (AXIS Ultra

DLD, Kratos Inc.) under  $\sim 10^{-8}$  Torr and using AFM (Veeco, Digital Instruments Nanoscope IIIA), respectively.

*Device fabrication and characterization:* A patterned indium tin oxide (ITO,  $\sim 10 \Omega/\square$ ) substrate was cleaned and UV/O<sub>3</sub>-treated for 30 min. Then, CrGO (1 mg/ml) and FrGO (1 mg/ml) were spin-coated using a gradient spin-rpm from 700 to 3500 rpm for 45 s, followed by drying at 120 °C for 10 min. The conventional PEDOT:PSS (Clevios™ P VP AI 4083) film as a reference hole transporting layer was also fabricated using spin-coating at 5000 rpm for 40 s, and subsequently dried at 120 °C for 10 min. As photoactive layers, poly(3-hexylthiophene) (P3HT, Rieke Metals), poly[[4,8-bis[(2-ethylhexyl)oxy]benzo[1,2-b:4,5-b']dithiophene-2,6-diyl][3-fluoro-2-[(2-ethylhexyl)carbonyl]-thieno[3,4-b]thiophenediyl]] (PTB7, 1-material), [6,6]-phenyl-C<sub>61</sub> butyric acid methyl ester (PC<sub>61</sub>BM, Nano-C), [6,6]-phenyl-C<sub>71</sub> butyric acid methyl ester (PC<sub>71</sub>BM, Nano-C), and indene-C<sub>60</sub> bis-adduct (ICBA, 1-material) were used. First, a 1 ml P3HT (25 mg) and PC<sub>61</sub>BM (25mg) blended solution in 1,2-dichlorobenzene (DCB) was spin-coated at 700 rpm for 60 s, followed by solvent annealing for 2 h and thermal annealing at 110 °C for 10 min in an N<sub>2</sub>-filled glove box. For the preparation of PTB7:PC<sub>71</sub>BM active films, a blend solution mixed with PTB7 (10 mg), PC<sub>71</sub>BM (15 mg), and 1,8-diiodooctane (5 vol. %) in 1 ml of chlorobenzene was spin-coated at 2000 rpm for 40s. For the formation of the P3HT:ICBA active films, a blend solution mixed with P3HT (22 mg) and ICBA (22 mg) in 1 ml of DCB was spin-coated at 700 rpm for 60 s, followed by thermal annealing at 150 °C for 10min. Finally, thermal evaporation was used for the metal-cathode formation of Ca/Al (20/100 nm) with an active area of 4.64 mm<sup>2</sup> under a pressure of 10<sup>-6</sup> Torr. The photocurrent density-voltage (J-V) curves were measured using a Keithley 2400 instrument under the standard 100 mW/cm<sup>2</sup> illumination and AM 1.5 G condition and using the standard Si-based solar cell certified by the International System of

Units (SRC-1000-TC-KG5-N, VLSI standards, Inc). The OPV operation times were recorded as a function of air-exposure time based on the ISOS-D-1 protocol.

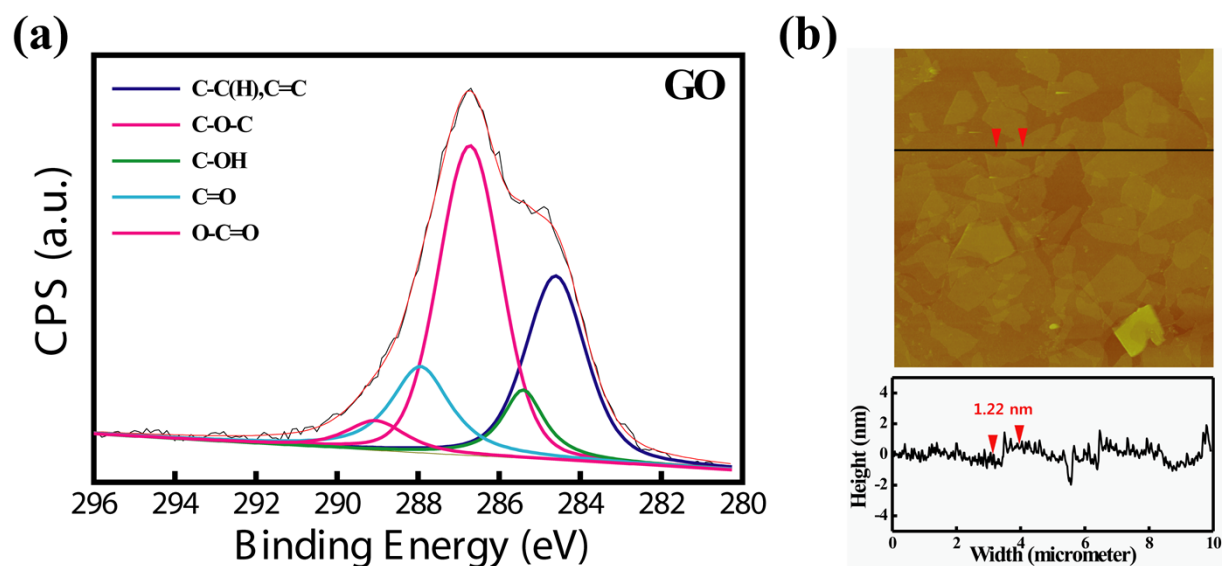

**Figure S1.** (a) XPS spectra and (b) AFM images of GO.

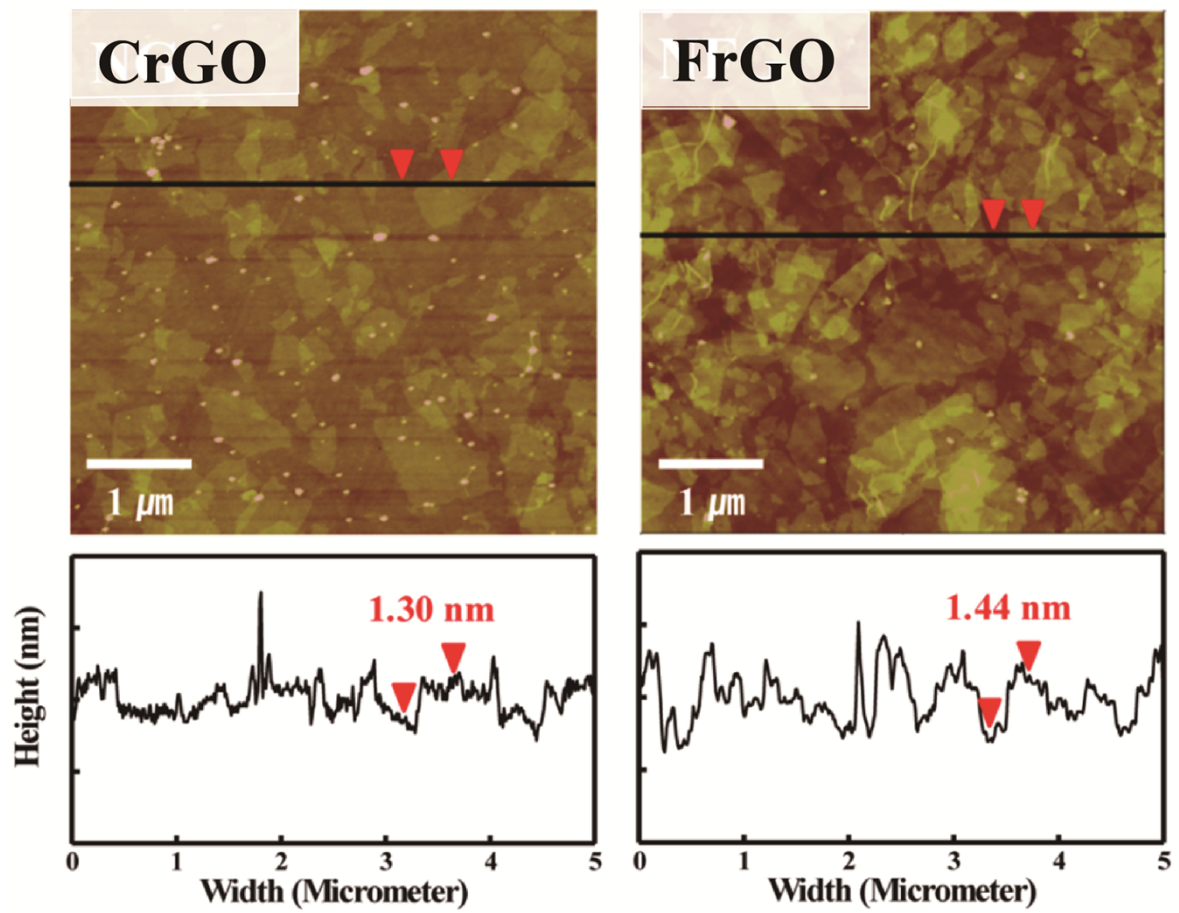

**Figure S2.** AFM images of CrGO and FrGO.

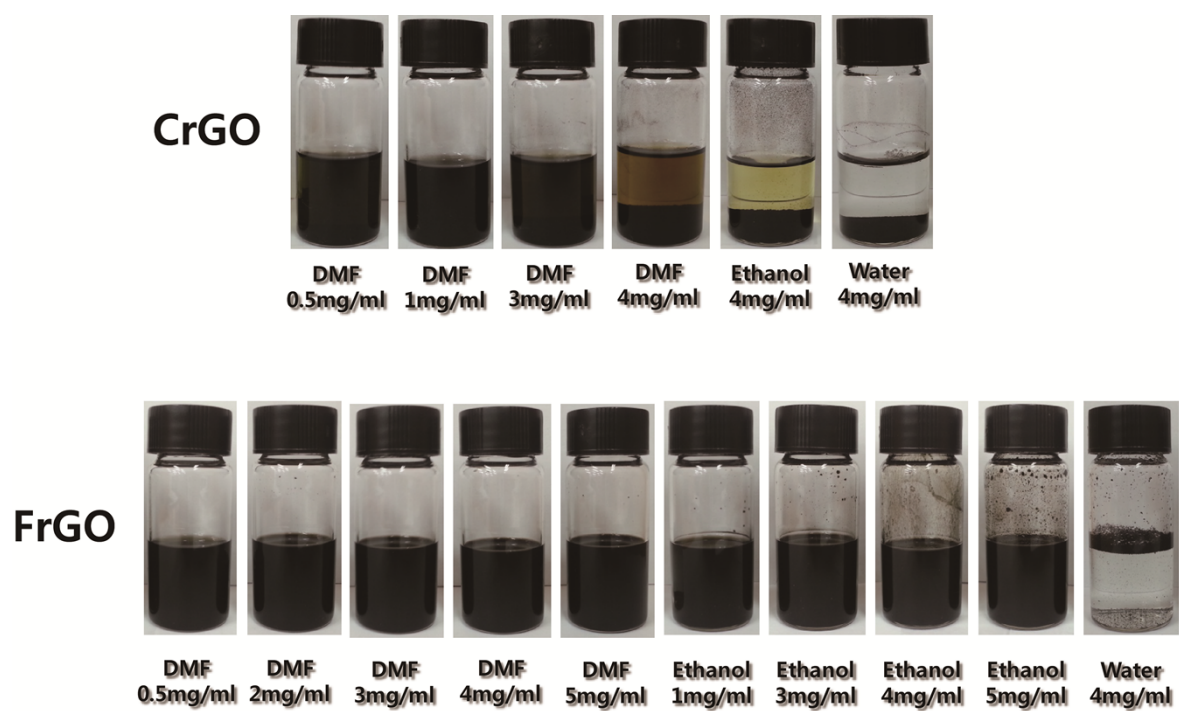

**Figure S3.** Degree of dispersion of the CrGO and FrGO in the various solutions.

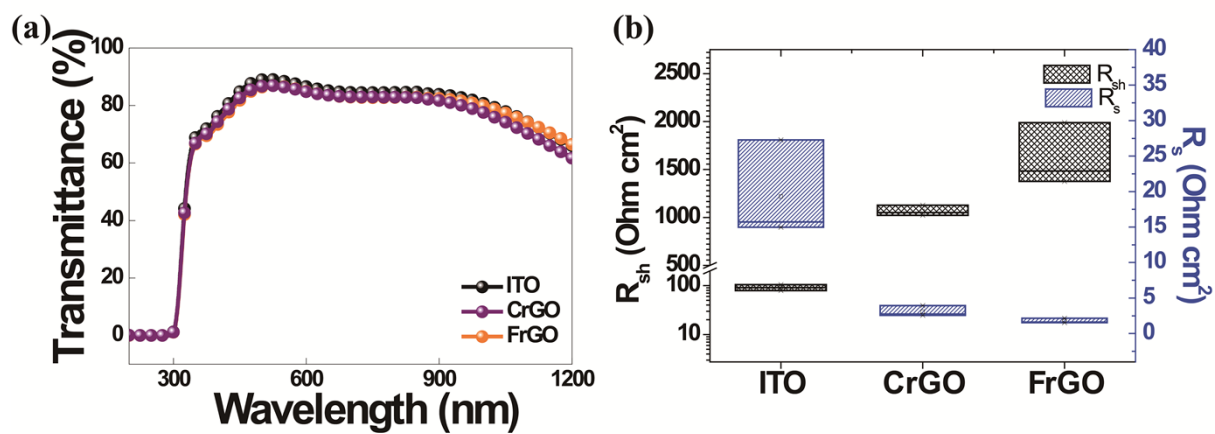

**Figure S4.** (a) Optical transmittance spectra of ITO, CrGO, and FrGO. (b)  $R_s$  and  $R_{sh}$  of different anode interfacial layers.

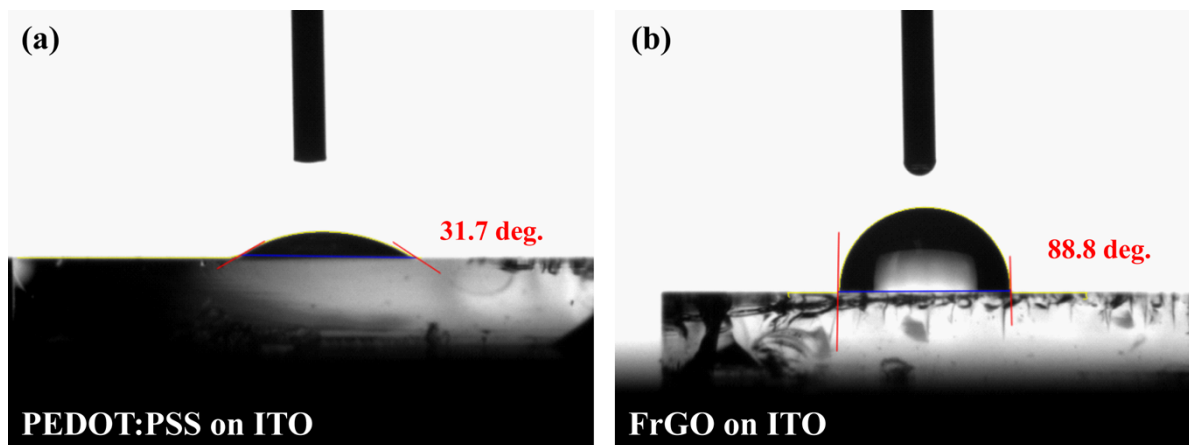

**Figure S5.** Contact angle images of (a) PEDOT:PSS and (b) FrGO on ITO substrate.

**Table S1.** Representative cell performances of solar cells incorporating different hole transporting layers.

|      | PCE<br>(%) | V <sub>oc</sub><br>(V) | FF<br>(%) | J <sub>sc</sub><br>(mA/cm <sup>2</sup> ) |
|------|------------|------------------------|-----------|------------------------------------------|
| ITO  | 0.82       | 0.41                   | 24.49     | 8.08                                     |
| CrGO | 2.85       | 0.53                   | 63.28     | 8.50                                     |
| FrGO | 3.64       | 0.60                   | 69.55     | 8.78                                     |

**Table S2.** Photovoltaic characteristics with average values for P3HT-based cells incorporating different HTLs.

|      | PCE<br>(%)         | V <sub>oc</sub><br>(V) | FF<br>(%)          | J <sub>sc</sub> (mA/cm <sup>2</sup> ) | R <sub>sh</sub><br>(Ωcm <sup>2</sup> ) | R <sub>s</sub><br>(Ω cm <sup>2</sup> ) |
|------|--------------------|------------------------|--------------------|---------------------------------------|----------------------------------------|----------------------------------------|
| ITO  | 0.949<br>(± 0.133) | 0.384<br>(± 0.032)     | 30.17<br>(± 5.906) | 8.084<br>(± 0.287)                    | 19.32<br>(± 6.902)                     | 91.83<br>(± 12.49)                     |
| CrGO | 2.81<br>(± 0.11)   | 0.53<br>(± 0.02)       | 62.54<br>(± 2.58)  | 8.46<br>(± 0.24)                      | 1067.62<br>(± 54.24)                   | 3.08<br>(± 0.74)                       |
| FrGO | 3.62<br>(± 0.15)   | 0.60<br>(± 0.00)       | 68.74<br>(± 1.06)  | 8.83<br>(± 0.20)                      | 1616.69<br>(± 326.10)                  | 1.77<br>(± 0.34)                       |

**Table S3.** Photovoltaic characteristics for PTB7:PC<sub>71</sub>BM and P3HT:ICBA-based OPVs with FrGO or PEDOT:PSS.

|            | PCE<br>(%) | V <sub>oc</sub><br>(V) | FF<br>(%) | J <sub>sc</sub><br>(mA/cm <sup>2</sup> ) |
|------------|------------|------------------------|-----------|------------------------------------------|
| PTB7_FrGO  | 6.71       | 0.70                   | 65.10     | 14.84                                    |
| PTB7_PEDOT | 6.85       | 0.71                   | 63.76     | 15.05                                    |
| ICBA_FrGO  | 4.57       | 0.83                   | 63.65     | 8.65                                     |
| ICBA_PEDOT | 4.67       | 0.85                   | 60.25     | 9.08                                     |
